# Supplementary material for: Proteomic Profiling of Primary Human Acute Myeloid Leukemia Cells Does Not Reflect Their Constitutive Release of Soluble Mediators
Source: MDPI journal article supplement (doi:10.3390/proteomes7010001), 2018-12-20
Supplement: s1 [file s1]

**Supplemental Table 1. Levels of constitutive cytokine release during *in vitro* culture by enriched primary human AML cells.** For each mediator we present the number of patients (n=19 patient samples were included) with detectable levels together with the median level (pg/mL) and the range for those patients showing detectable levels when measured with Luminex/ELISA assays. The mediators showing detectable levels in the proteomic examination are marked with an asterisk to the left in the figure.

| Mediator                                           | Number | Median  | Range        | Fold variation |
|----------------------------------------------------|--------|---------|--------------|----------------|
| Chemokines (n=11)                                  |        |         |              |                |
| CCL2                                               | 19     | 262     | 1.4-8202     | 5859           |
| CCL3                                               | 19     | 451     | 131->30,000  | >229           |
| CCL4                                               | 19     | 254     | 45.9-11,744  | 256            |
| * CCL5                                             | 19     | 56.3    | 17.4-2481    | 143            |
| CCL28                                              | 5      | 123     | 53.8-432     | 8              |
| CXCL1                                              | 19     | 110     | 51.5-3520    | 68             |
| CXCL2                                              | 17     | 21.1    | 2.3-9057     | 3938           |
| CXCL5                                              | 18     | 313     | 6.6-13,980   | 2118           |
| CXCL8                                              | 19     | 1676    | 1.8->18,500  | >10,278        |
| CXCL10                                             | 19     | 11.7    | 1.6-15,504   | 9690           |
| CXCL11                                             | 19     | 91.4    | 62.5-246     | 3.9            |
| Interleukins - immunoregulators (n=6)              |        |         |              |                |
| IL1 $\beta$                                        | 19     | 4.4     | 1.2-763      | 636            |
| IL1RA                                              | 19     | >10,750 | 7.5->10,750  | >1433          |
| IL6                                                | 10     | 142     | 1.5-4335     | 2890           |
| IL10                                               | 19     | 1.6     | 1.3-7.4      | 5.7            |
| IL33                                               | 19     | 8.9     | 7.7-22.0     | 2.9            |
| TNF $\alpha$                                       | 19     | 11.8    | 0.8-692      | 865            |
| Growth factors (n=8)                               |        |         |              |                |
| Angiopoietin 1                                     | 14     | 130     | 7.2-454      | 63             |
| TEK/Tie-2 (angiopoietin receptor)                  | 19     | 190     | 121-248      | 2              |
| FGF2 (fibroblast growth factor)                    | 19     | 19.6    | 14.2-23.9    | 1.7            |
| G-CSF (granulocyte colony-stimulating factor)      | 6      | 15.2    | 0.22-60.5    | 275            |
| GM-CSF (granulocyte-macrophage CSF)                | 19     | 12.4    | 10.3-555     | 54             |
| HGF (hepatocyte growth factor)                     | 19     | 36.9    | 5.9-506      | 86             |
| Hb-EGF (Proheparin-binding EGF-like growth factor) | 19     | 17.7    | 4.7-70.8     | 15             |
| VEGF (vascular endothelial growth factor)          | 19     | 12.3    | 6.7-51.6     | 7.7            |
| Proteases and protease regulators (n=14)           |        |         |              |                |
| MMP1 (matrix metalloprotease 1)                    | 19     | 40.3    | 28.7-4552    | 159            |
| MMP2                                               | 19     | 1981    | 367-9485     | 26             |
| * MMP9                                             | 12     | 23,957  | 1123-261,935 | 233            |
| * TIMP1 (tissue inhibitor of MMP 1)                | 19     | 2298    | 580-34,789   | 60             |
| * Caspase 1                                        | 9      | 8.1     | 1.0-28.0     | 28             |
| * BSG (basigin)                                    | 19     | 401     | 61.2-1876    | 31             |

|                                            |    |        |               |     |
|--------------------------------------------|----|--------|---------------|-----|
| * CFD (complement factor D)                | 13 | 4106   | 123-18,426    | 150 |
| * Cystatin B/CSTB                          | 18 | 2846   | 165-17,949    | 109 |
| * Cystatin C/CST3                          | 19 | 3075   | 233-52,208    | 224 |
| * Neutrophil elastase/ELANE                | 13 | 11,224 | 1072-203,665  | 190 |
| * Serpin E1                                | 19 | 1131   | 36.2-23,925   | 661 |
| Serpin C1                                  | 19 | 61,579 | 52,373-64,196 | 1.2 |
| SLPI (antileukoproteinase)                 | 7  | 19     | 6-163         | 27  |
| uPA (urokinase-type plasminogen activator) | 19 | 373    | 53.4-2438     | 46  |

---

ADAM12 (proteases A disintegrin and metalloprotease domain 12) and ADAMTS 13 (ADAM with thrombospondin type 1 motif member 13) showed detectable levels for none and for 2 patients, respectively.
