# Supplementary material for: Proteomic Profiling of Primary Human Acute Myeloid Leukemia Cells Does Not Reflect Their Constitutive Release of Soluble Mediators
Source: MDPI journal article supplement (doi:10.3390/proteomes7010001), 2018-12-20
Supplement: s1 [file s1]

| Patient code          | CFD (complement factor D) (Acc. no P00746) |               |                         | TIMP-1 (Acc. No P01033)          |               |                         | Cystatin C/CST3 (Acc. No P01034) |               |                         | Cystatin B/CSTB (Acc. No P04080) |               |                         | Serpini E1 (Acc. No P05121)      |               |                         | Neutrophil elastase/ELANE (Acc. No P08246) |               |                         | CCL5 (Acc. No P13501)            |               |                         | MMP-9 (Acc. No P14780)           |               |                         | Caspase 1 (Acc. No P29466)       |               |                         | BSG/CD147 (Acc. No P35613)       |               |                         |           |               |           |
|-----------------------|--------------------------------------------|---------------|-------------------------|----------------------------------|---------------|-------------------------|----------------------------------|---------------|-------------------------|----------------------------------|---------------|-------------------------|----------------------------------|---------------|-------------------------|--------------------------------------------|---------------|-------------------------|----------------------------------|---------------|-------------------------|----------------------------------|---------------|-------------------------|----------------------------------|---------------|-------------------------|----------------------------------|---------------|-------------------------|-----------|---------------|-----------|
|                       | Proteomics (intracellular level)           |               | Constitutively released | Proteomics (intracellular level) |               | Constitutively released | Proteomics (intracellular level) |               | Constitutively released | Proteomics (intracellular level) |               | Constitutively released | Proteomics (intracellular level) |               | Constitutively released | Proteomics (intracellular level)           |               | Constitutively released | Proteomics (intracellular level) |               | Constitutively released | Proteomics (intracellular level) |               | Constitutively released | Proteomics (intracellular level) |               | Constitutively released | Proteomics (intracellular level) |               | Constitutively released |           |               |           |
|                       | #Peptides                                  | LFQ intensity |                         | #Peptides                        | LFQ intensity |                         | #Peptides                        | LFQ intensity |                         | #Peptides                        | LFQ intensity |                         | #Peptides                        | LFQ intensity |                         | #Peptides                                  | LFQ intensity |                         | #Peptides                        | LFQ intensity |                         | #Peptides                        | LFQ intensity |                         | #Peptides                        | LFQ intensity |                         | #Peptides                        | LFQ intensity |                         | #Peptides | LFQ intensity | #Peptides |
| P1                    | 8                                          | 11132000      | 627                     | 1                                | 2749000       | 767                     | 0                                | n.d.          | 693.5                   | 5                                | 44702000      | 640                     | 0                                | n.d.          | 136.5                   | 7                                          | 251330000     | 5022                    | 0                                | n.d.          | 17.4                    | 4                                | 1454500       | n.d.                    | 23                               | 277290000     | nd                      | 6                                | 41283000      | nd                      | 97        |               |           |
| P1                    | 6                                          | 21364000      | 7651                    | 1                                | 1680000       | 30961                   | 1                                | 11482000      | 17964.1                 | 4                                | 24444000      | 2700                    | 1                                | 627000        | 23024.9                 | 11                                         | 190420000     | 4451                    | 0                                | n.d.          | 323.7                   | 17                               | 16800000      | 26395                   | 22                               | 295640000     | 6.3                     | 7                                | 41212000      | 1486.5                  | 7         |               |           |
| P2                    | 4                                          | 8223000       | 3923                    | 2                                | 2666300       | 4312                    | 1                                | 7266000       | 4321.6                  | 4                                | 9591300       | 487                     | 1                                | 1147200       | 1983.2                  | 8                                          | 408080000     | 39348                   | 0                                | n.d.          | 27.1                    | 0                                | n.d.          | 24683                   | 18                               | 103560000     | nd                      | 5                                | 25383000      | 141.7                   | 5         |               |           |
| P4                    | 7                                          | 28145000      | 18426                   | 0                                | n.d.          | 25140                   | 0                                | n.d.          | 34039000                | 12208.4                          | 2             | 1742000                 | 17949                            | 0             | n.d.                    | 2209.2                                     | 10            | 135010000               | 54037                            | 1             | n.d.                    | 293.5                            | 1             | 444510                  | 22961                            | 17            | 145650000               | 1                                | 5             | 60663000                | 1368.2    | 1             |           |
| P7                    | 3                                          | 6580000       | 744                     | 7                                | 15908000      | 1587                    | 0                                | n.d.          | 2240.6                  | 2                                | 245100        | n.d.                    | 7                                | 101160000     | 1130.7                  | 7                                          | 27912000      | n.d.                    | 2                                | 24813000      | 2481.3                  | 0                                | n.d.          | n.d.                    | 17                               | 77101000      | nd                      | 7                                | 56553000      | 149.8                   | 8         |               |           |
| P8                    | 9                                          | 6939200       | 1182                    | 1                                | 2799000       | 1249                    | 3                                | 18022000      | 2813.9                  | 1                                | 128840        | 7238                    | 1                                | 335500        | 286.3                   | 11                                         | 36172000      | n.d.                    | 0                                | n.d.          | 43.1                    | 1                                | 821180        | 1123                    | 11                               | 3013000       | 26.5                    | 6                                | 6879600       | 409.6                   | 6         |               |           |
| P9                    | 8                                          | 81825000      | 1318                    | 1                                | 1863400       | 2298                    | 1                                | 7041000       | 1903.2                  | 4                                | 29213000      | 3479                    | 1                                | 630960        | 864.9                   | 11                                         | 256730000     | 12483                   | 1                                | 929370        | 57.5                    | 26                               | 711020000     | 7693                    | 23                               | 284840000     | 9.5                     | 6                                | 13877000      | 401.2                   | 6         |               |           |
| P2                    | 3                                          | 762700        | n.d.                    | 1                                | 410000        | 972                     | 1                                | 11382000      | 2366.8                  | 3                                | 1040200       | 165                     | 0                                | 521950        | 1527.7                  | 6                                          | 560330000     | 3583                    | 0                                | n.d.          | 56.1                    | 1                                | 606000        | n.d.                    | 20                               | 13680000      | 5.7                     | 5                                | 75383000      | 522.3                   | 3         |               |           |
| P9                    | 5                                          | 2017600       | n.d.                    | 2                                | 2415400       | 1170                    | 1                                | 10723000      | 6768                    | 1                                | 4513700       | 3648                    | 1                                | n.d.          | 36.2                    | 10                                         | 41833000      | n.d.                    | 0                                | n.d.          | 20.3                    | 3                                | 609010        | n.d.                    | 12                               | 111020000     | nd                      | 5                                | 11717000      | 105.3                   | 1         |               |           |
| P30                   | 1                                          | 3383500       | n.d.                    | 3                                | 4633900       | 788                     | 0                                | n.d.          | 693.5                   | 1                                | 839670        | 4934                    | 1                                | 474040        | 180.7                   | 7                                          | 44239000      | n.d.                    | 1                                | 1833700       | 320.9                   | 12                               | 10233000      | n.d.                    | 1                                | 2690800       | 8.1                     | 2                                | 51736000      | 83.2                    | 2         |               |           |
| P32                   | 0                                          | n.d.          | n.d.                    | 1                                | 2141300       | 964                     | 1                                | 4334600       | 693.5                   | 4                                | 6734900       | 1275                    | 5                                | 7933600       | 276.4                   | 10                                         | 15999000      | 3907                    | 1                                | 1110400       | 27.4                    | 11                               | 5607700       | n.d.                    | 11                               | 2782300       | nd                      | 5                                | 4399600       | 77.1                    | 1         |               |           |
| P36                   | 7                                          | 56247000      | 4106                    | 4                                | 27047000      | 34115                   | 2                                | 25188000      | 7472.2                  | 5                                | 101570000     | 7674                    | 2                                | 1401500       | 9151.5                  | 9                                          | 238140000     | 10772                   | 0                                | n.d.          | 348.5                   | 12                               | 6399700       | 228146                  | 20                               | 369870000     | 28                      | 8                                | 90217400      | 1875.9                  | 8         |               |           |
| P38                   | 9                                          | 7430200       | 5555                    | 2                                | 1301000       | 13893                   | 1                                | 1798300       | 14386.7                 | 4                                | 13823000      | 1477                    | 0                                | n.d.          | 1387.8                  | 10                                         | 572320000     | 203665                  | 0                                | n.d.          | 333.8                   | 1                                | 330900        | 10400                   | 23                               | 33329000      | nd                      | 5                                | 36612000      | 472.1                   | 5         |               |           |
| P39                   | 8                                          | 81361000      | 4760                    | 2                                | 1693700       | 18959                   | 2                                | 15778000      | 17106                   | 5                                | 12871000      | 1661                    | 1                                | 267940        | 21867.9                 | 9                                          | 167900000     | n.d.                    | 0                                | n.d.          | 119.2                   | 0                                | n.d.          | 58237                   | 21                               | 366770000     | nd                      | 6                                | 59568000      | 1375.2                  | 2         |               |           |
| P44                   | 9                                          | 19294000      | 13337                   | 3                                | 9416200       | 34789                   | 3                                | 29831000      | 48278.9                 | 5                                | 85942000      | 4200                    | 3                                | 1982200       | 4378.3                  | 9                                          | 766680000     | 13613                   | 1                                | 1396100       | 76.8                    | 0                                | n.d.          | 200178                  | 24                               | 437300000     | 3.7                     | 7                                | 100050000     | 1029.9                  | 7         |               |           |
| P46                   | 9                                          | 101940000     | 7797                    | 6                                | 30593000      | 24776                   | 2                                | 24659000      | 14995.7                 | 5                                | 20027000      | 837                     | 6                                | 3237000       | 1320.8                  | 9                                          | 38713000      | 16074                   | 1                                | 7171500       | 210.7                   | 3                                | 163720        | 219568                  | 25                               | 29565000      | 21.9                    | 7                                | 86236000      | 147.1                   | 7         |               |           |
| P48                   | 8                                          | 43303000      | 121                     | 3                                | 6838300       | 1262                    | 1                                | 3277100       | 1137                    | 2                                | 2527500       | 2923                    | 3                                | 1402380       | 394.5                   | 11                                         | 102750000     | 7180                    | 0                                | n.d.          | 56.3                    | 18                               | 12529000      | 9067                    | 13                               | 7165000       | nd                      | 4                                | 101210000     | 125.5                   | 5         |               |           |
| P6                    | 4                                          | 7791210       | n.d.                    | 0                                | n.d.          | 580                     | 2                                | 1095800       | 233.3                   | 0                                | n.d.          | 831                     | 0                                | n.d.          | 78.5                    | 6                                          | 7529600       | 11214                   | 0                                | n.d.          | 54.1                    | 0                                | n.d.          | 6                       | 2080300                          | nd            | 4                       | 22431000                         | 70.1          | 3                       | 2437300   | 113.3         | 4         |
| P9                    | 3                                          | 5333800       | n.d.                    | 1                                | 6618600       | 791                     | 1                                | 5963000       | 3075.4                  | 4                                | 7537800       | 2385                    | 4                                | 6481200       | 120.1                   | 2                                          | 3073300       | n.d.                    | 0                                | n.d.          | 43.6                    | 0                                | n.d.          | n.d.                    | 17                               | 5700200       | nd                      | 5                                | 33191000      | 61.2                    | 2         |               |           |
| # valid values        | 18                                         | 13            |                         | 17                               | 10            |                         | 16                               | 10            |                         | 18                               | 10            | 14                      | 10                               | 19            | 13                      | 19                                         | 13            | 7                       | 19                               | 13            | 12                      | 13                               | 12            | 19                      | 9                                | 19            | 19                      | 19                               | 19            | 19                      | 19        |               |           |
| Max value             | 281450000                                  | 18426         |                         | 15908000                         | 34789         |                         | 34039000                         | 52208.4       |                         | 101570000                        | 17949         | 101160000               | 23925                            | 2567300000    | 203665                  |                                            | 24813000      | 2481                    |                                  | 24813000      | 2481                    | 711020000                        | 261935        |                         | 437300000                        | 28.0          |                         | 101210000                        | 1875.9        |                         |           |               |           |
| Min value             | 2017600                                    | 121           |                         | 508000                           | 580           |                         | 1796300                          | 233.3         |                         | 839670                           | 105           | 287640                  | 36.2                             | 3073300       | 8072                    |                                            | 929370        | 17.4                    |                                  | 929370        | 17.4                    | 301180                           | 1123          |                         | 2690800                          | 1.00          |                         | 22437000                         | 61.2          |                         |           |               |           |
| Fold change (Max-Min) | 139                                        | 150           |                         | 95                               | 60            |                         | 18.9                             | 224           |                         | 121                              | 209           | 412                     | 661                              | 835           | 190                     |                                            | 2361          | 143                     |                                  | 2361          | 143                     | 2381                             | 2381          |                         | 163                              | 28.0          |                         | 4.5                              | 36.7          |                         |           |               |           |
| Median                | 49771500                                   | 4106          |                         | 3106500                          | 2298          |                         | 11052500                         | 3075          |                         | 8564450                          | 2846          | 1275000                 | 1131                             | 387130000     | 11224                   |                                            | 1749900       | 56.3                    |                                  | 1454500       | 23956.5                 | 111020000                        |               | 8.1                     | 53072000                         |               |                         | 53072000                         | 401           |                         |           |               |           |
